# Supplementary material
Source: PubMed Central journal article supplement (PMC9360900)
Supplement: ajtr0014-5088-f4.pdf [file ajtr0014-5088-f4.pdf]

## Contents of qPCR validation

### Methods

**Table S1.** PCR Primers for qPCR

| Primers                | Sequence                  | Length | Tm   |
|------------------------|---------------------------|--------|------|
| <i>NPHP1</i> -exon5-F  | TCAACCGGTGAAGAATACATCG    | 123    | 60°C |
| <i>NPHP1</i> -exon5-R  | CTGTTAGGTATGGACATCGACCC   |        |      |
| <i>NPHP1</i> -exon11-F | ACATTTTCATAAGCCGAATTCACAA | 192    | 60°C |
| <i>NPHP1</i> -exon11-R | GGCGTACATGTCTGCTGAGAA     |        |      |
| <i>AHI1</i> -exon15-F  | TGGACGTTTCATGAGAGAATTGTG  | 161    | 60°C |
| <i>AHI1</i> -exon15-R  | GCTTTCCTTGACAGCAAACAGC    |        |      |
| <i>AHI1</i> -exon16-F  | TCTGCCATATTGGTCCGACA      | 173    | 60°C |
| <i>AHI1</i> -exon16-R  | TGCGCAATCATCAGTACATAACC   |        |      |
| $\beta$ -globin-QF     | ACACAACGTGTTCCTACTAGC     | 110    | 60°C |
| $\beta$ -globin-QR     | CAACTTCATCCACGTTCCACC     |        |      |

### Reaction reagents and condition

The expression level was assessed by real-time Quantitative Fluorescence PCR using SYBR Premix Ex Taq II (Perfect Real Time) (Takara) with ABI 7500 system. Data are presented as mean  $\pm$  standard deviation of three independent real-time PCR experiments. The PCR cycle was as follows: 10 min 95°C, 1 cycle; 10 s 95°C, 30 s 60°C + fluorescence acquisition, 55 cycles. Values for each gene were normalized to expression level of beta-actin gene (ACTB) via the  $2^{-\Delta\Delta CT}$  method.

### Results

As demonstrated in the figures below, qPCR verified the CNV calling by WES.

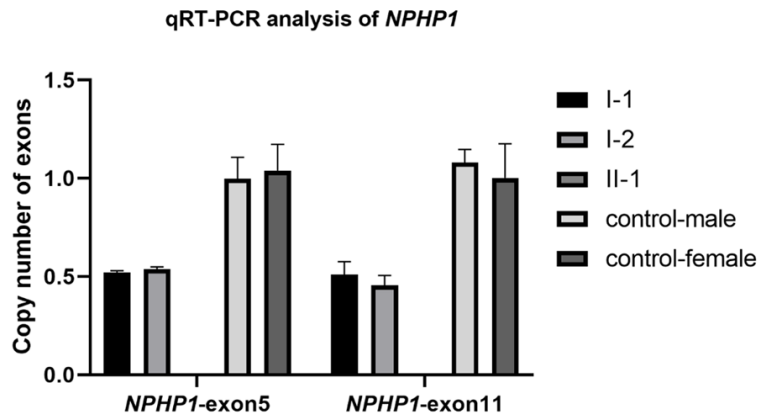

**Figure S1.** The qPCR results for exon5 and 11 in the *NPHP1* gene on the samples from members of Case 2 and controls.

## Four Joubert syndrome cases

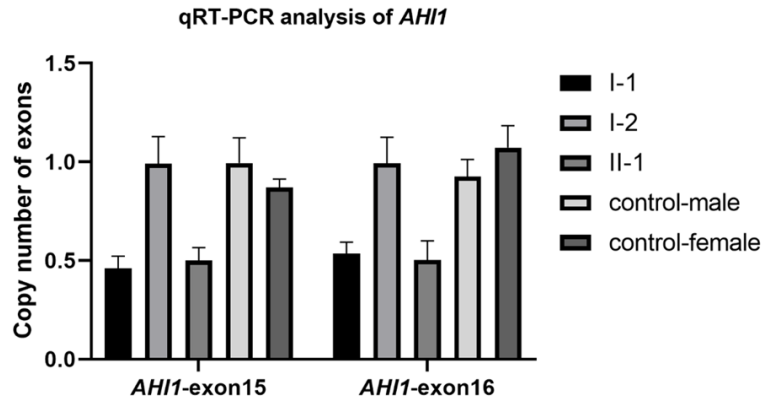

**Figure S2.** The qPCR results for exon15 and 16 in the *AHI1* gene on the samples from members of Case 3 and controls.
